# Supplementary material
Source: publisher figshare collection journal article supplement (https://acs.figshare.com/ndownloader/files/26627923)
Supplement: Supplementary file 1 [file 26627923]

## Sheet: 2-D Annotation Enrichment Modsc
33 vs 5hr Fold Change	Log2 T2_Phos/T2_Prot	Type	Size	P value	Benj. Hoch. FDR	Names
-0.170393	0.367886	GOMF name	296	0	0	phospholipid binding
-0.0478546	0.188359	GOBP name	2191	0	0	biological regulation
-0.0404455	0.184721	GOBP name	1945	1.55431e-15	1.43981e-12	regulation of cellular process
-0.0430429	0.183182	GOBP name	1992	1.55431e-15	2.15972e-12	regulation of biological process
-0.146034	0.332516	GOMF name	320	3.55271e-15	1.92557e-12	lipid binding
0.271696	-0.452676	GOCC name	143	5.32907e-15	3.12284e-12	preribosome
0.240256	-0.315996	GOBP name	258	5.77316e-15	4.0109e-12	ncRNA processing
0.31116	-0.0587413	GOCC name	411	2.24265e-14	6.57097e-12	ribonucleoprotein complex
0.24429	-0.279043	GOBP name	275	5.70655e-14	3.1717e-11	ncRNA metabolic process
0.0179034	0.187306	GOBP name	1535	8.92619e-14	4.13432e-11	cellular component organization at cellular level
0.0234951	0.193507	GOCC name	1302	1.82299e-13	3.5609e-11	protein complex
0.278949	-0.353539	GOBP name	171	3.52829e-13	1.40073e-10	rRNA processing
0.273679	-0.339496	GOBP name	179	6.10845e-13	2.12192e-10	rRNA metabolic process
0.221032	-0.311796	GOCC name	225	2.06324e-12	3.02264e-10	nucleolus
-0.0231353	0.190002	GOBP name	1159	2.23421e-12	6.89875e-10	organelle organization
0.0185008	0.162759	GOMF name	2646	6.87272e-12	2.48334e-09	binding
0.0982273	0.14031	GOCC name	1629	1.21825e-11	1.42779e-09	macromolecular complex
0.268148	0.0510967	GOMF name	432	3.48139e-11	9.43457e-09	RNA binding
-0.0761506	-0.216177	GOCC name	623	8.31739e-11	8.12332e-09	integral to membrane
0.498746	0.252644	GOMF name	93	9.01645e-11	1.95477e-08	translation factor activity, nucleic acid binding
-0.0766136	-0.214991	GOCC name	624	9.74725e-11	8.15984e-09	intrinsic to membrane
0.510995	0.305141	GOMF name	81	1.20398e-10	2.17519e-08	translation initiation factor activity
-0.2309	0.326239	GOBP name	167	1.94532e-10	5.40604e-08	cellular macromolecule localization
0.0335198	0.1499	GOBP name	1688	6.3207e-10	1.59684e-07	cellular component organization or biogenesis at cellular level
0.0280001	0.145125	GOBP name	1879	1.20076e-09	2.78076e-07	cellular component organization
-0.223669	0.675774	GOBP name	47	1.44172e-09	3.08196e-07	cytokinesis, completion of separation
0.414631	0.327385	KEGG name	90	1.94094e-09	3.80424e-07	RNA transport
-0.219032	0.501268	GOBP name	77	2.73992e-09	5.43874e-07	budding cell apical bud growth
0.152506	0.173916	GOBP name	501	3.30087e-09	6.11542e-07	macromolecular complex subunit organization
0.151912	0.174094	GOBP name	494	4.29612e-09	7.46183e-07	cellular macromolecular complex subunit organization
0.193922	-0.172235	GOBP name	345	5.91575e-09	9.6705e-07	RNA processing
0.0181009	0.165754	GOBP name	1012	8.12302e-09	1.2541e-06	regulation of gene expression
-0.158714	0.275738	GOBP name	216	1.08851e-08	1.59209e-06	macromolecule localization
-0.0180889	0.164791	GOBP name	967	1.32117e-08	1.83577e-06	regulation of nitrogen compound metabolic process
-0.018934	0.164478	GOBP name	966	1.38926e-08	1.83845e-06	regulation of nucleobase-containing compound metabolic process
-0.270357	0.343047	GOBP name	109	1.59413e-08	2.01367e-06	cellular protein localization
0.272747	-0.531913	GOBP name	57	2.0544e-08	2.48225e-06	cleavage involved in rRNA processing
0.0105697	0.149617	GOBP name	1259	2.2041e-08	2.55217e-06	regulation of metabolic process
0.0958208	0.281924	GOBP name	250	2.46898e-08	2.74452e-06	chromatin modification
-0.0717848	0.170143	GOCC name	677	2.88742e-08	2.11504e-06	site of polarized growth
-0.0393721	0.232188	GOCC name	394	2.96185e-08	1.92849e-06	cell projection part
0.0364627	0.128902	GOBP name	1949	3.37232e-08	3.60449e-06	cellular component organization or biogenesis
0.00843369	0.147153	GOBP name	1218	5.28902e-08	5.44377e-06	regulation of cellular metabolic process
0.360375	0.136796	GOBP name	138	5.8891e-08	5.84493e-06	posttranscriptional regulation of gene expression
0.0250729	0.155649	GOBP name	1001	6.07435e-08	5.82091e-06	regulation of macromolecule biosynthetic process
-0.0578947	-0.286867	GOMF name	241	6.40595e-08	9.92006e-06	substrate-specific transmembrane transporter activity
0.0251241	0.154937	GOBP name	1000	7.0336e-08	6.51546e-06	regulation of cellular macromolecule biosynthetic process
-0.0756735	-0.269319	GOMF name	261	8.66823e-08	1.17454e-05	transmembrane transporter activity
0.360762	0.18574	GOBP name	121	9.39097e-08	8.41855e-06	regulation of translation
-0.0137444	0.252548	GOCC name	308	1.21094e-07	7.09612e-06	nucleoplasm part
-0.0398678	0.153345	GOBP name	880	1.40856e-07	1.22325e-05	regulation of RNA metabolic process
0.0134587	0.144659	GOBP name	1144	1.57233e-07	1.32409e-05	regulation of macromolecule metabolic process
0.0184588	0.142208	GOBP name	1194	1.57507e-07	1.28739e-05	regulation of primary metabolic process
0.0937799	0.158807	GOBP name	636	1.65602e-07	1.31488e-05	cellular component assembly
-0.0403762	0.153588	GOBP name	857	1.7655e-07	1.36287e-05	regulation of transcription, DNA-dependent
0.490045	0.354892	GOCC name	51	2.08259e-07	1.10945e-05	polysome
-0.194395	0.534586	GOBP name	54	2.27539e-07	1.709e-05	Rho protein signal transduction
0.0931973	0.157258	GOBP name	630	2.38389e-07	1.74338e-05	cellular component assembly at cellular level
0.024906	0.146421	GOBP name	1023	2.7574e-07	1.91571e-05	regulation of biosynthetic process
0.024906	0.146421	GOBP name	1023	2.7574e-07	1.96483e-05	regulation of cellular biosynthetic process
-0.0366483	0.21786	GOCC name	384	2.80374e-07	1.36916e-05	mating projection tip
0.263016	-0.563963	GOBP name	44	2.93937e-07	1.99232e-05	endonucleolytic cleavage of tricistronic rRNA transcript (SSU-rRNA, 5.8S rRNA, LSU-rRNA)
0.263016	-0.563963	GOBP name	44	2.93937e-07	1.94488e-05	endonucleolytic cleavage involved in rRNA processing
-0.098428	0.134087	GOBP name	703	3.49989e-07	2.26191e-05	negative regulation of biological process
0.281725	0.337143	GOBP name	94	3.57423e-07	2.25745e-05	transcription elongation, DNA-dependent
0.0987603	0.226327	GOBP name	307	3.88527e-07	2.39937e-05	chromatin organization
0.316036	0.300451	GOCC name	94	4.40913e-07	1.9875e-05	RNA granule
-0.131442	0.197788	GOBP name	304	5.40177e-07	3.26337e-05	establishment or maintenance of cell polarity
-0.167769	0.279717	GOBP name	156	5.46903e-07	3.23371e-05	protein localization
0.2346	-0.57043	GOBP name	42	7.07772e-07	4.0977e-05	endonucleolytic cleavage in ITS1 to separate SSU-rRNA from 5.8S rRNA and LSU-rRNA from tricistronic rRNA transcript (SSU-rRNA, 5.8S rRNA, LSU-rRNA)
0.288278	0.341583	GOBP name	85	8.3169e-07	4.71687e-05	transcription elongation from RNA polymerase II promoter
-0.114082	0.183941	GOBP name	358	8.51305e-07	4.73155e-05	negative regulation of gene expression
0.0195279	0.194392	GOBP name	464	9.78742e-07	5.33319e-05	chromosome organization
0.245201	-0.419593	GOCC name	65	1.1542e-06	4.83116e-05	90S preribosome
0.0535611	0.156397	GOBP name	682	1.21694e-06	6.5036e-05	establishment of localization in cell
0.255184	-0.554307	GOBP name	41	1.21962e-06	6.39497e-05	ncRNA 5'-end processing
0.255184	-0.554307	GOBP name	41	1.21962e-06	6.16242e-05	rRNA 5'-end processing
0.255184	-0.554307	GOBP name	41	1.21962e-06	6.27654e-05	RNA 5'-end processing
0.448475	0.274339	GOCC name	59	1.22857e-06	4.79959e-05	stress granule
0.240032	-0.568652	GOBP name	40	1.26894e-06	6.29711e-05	endonucleolytic cleavage to generate mature 5'-end of SSU-rRNA from (SSU-rRNA, 5.8S rRNA, LSU-rRNA)
0.647753	0.622982	GOBP name	20	1.31257e-06	6.39935e-05	retrograde vesicle-mediated transport, Golgi to ER
0.0598109	0.189839	GOBP name	435	1.50561e-06	7.21396e-05	RNA biosynthetic process
0.149978	0.0278789	GOBP name	799	1.59314e-06	7.50395e-05	RNA metabolic process
-0.087076	0.253269	GOMF name	215	1.82533e-06	0.000219851	GTPase regulator activity
-0.175627	0.192779	GOBP name	223	1.92591e-06	8.92016e-05	establishment of cell polarity
0.247596	-0.372253	GOBP name	73	2.12918e-06	9.7e-05	nucleic acid phosphodiester bond hydrolysis
-0.220199	0.329482	GOBP name	92	2.50455e-06	0.00011226	regulation of Ras protein signal transduction
0.11302	0.285688	GOBP name	165	2.54718e-06	0.000112359	Golgi vesicle transport
-0.252168	-0.135593	KEGG name	191	2.73964e-06	0.000268484	Cell cycle - yeast
-0.0947706	0.121706	GOBP name	684	3.02286e-06	0.000131258	negative regulation of cellular process
-0.0827774	0.47548	GOBP name	61	3.59929e-06	0.000153884	positive regulation of transcription elongation from RNA polymerase II promoter
-0.230996	0.062976	GOBP name	257	3.62038e-06	0.00015244	regulation of cell cycle process
0.237388	-0.553909	GOBP name	38	4.02287e-06	0.000166859	endonucleolytic cleavage in 5'-ETS of tricistronic rRNA transcript (SSU-rRNA, 5.8S rRNA, LSU-rRNA)
-0.0695997	0.467162	GOBP name	63	4.16849e-06	0.000170356	regulation of transcription elongation from RNA polymerase II promoter
-0.0849745	0.459464	GOBP name	63	5.14439e-06	0.000207192	positive regulation of transcription elongation, DNA-dependent
-0.0501041	0.120405	GOBP name	997	5.24476e-06	0.000208217	cellular response to stimulus
-0.247267	0.311178	GOBP name	85	5.49439e-06	0.000215055	regulation of exit from mitosis
-0.0343205	0.169242	GOBP name	504	5.72019e-06	0.000220783	positive regulation of cellular process
-0.0721323	0.451897	GOBP name	65	5.89816e-06	0.000224534	regulation of transcription elongation, DNA-dependent
-0.197203	-0.719386	GOBP name	25	5.9598e-06	0.000223815	glucan biosynthetic process
-0.593248	0.265199	GOCC name	31	6.97643e-06	0.000255512	chromatin silencing complex
-0.115106	0.200443	GOBP name	256	7.05312e-06	0.000261342	regulation of response to stimulus
-0.616816	0.477672	GOBP name	21	8.05336e-06	0.000290653	negative regulation of growth
-0.616816	0.477672	GOBP name	21	8.05336e-06	0.000286927	negative regulation of growth of unicellular organism as a thread of attached cells
-0.616816	0.477672	GOBP name	21	8.05336e-06	0.000294478	negative regulation of filamentous growth
-0.616816	0.477672	GOBP name	21	8.05336e-06	0.000283295	negative regulation of pseudohyphal growth
-0.616816	0.477672	GOBP name	21	8.05336e-06	0.000279754	negative regulation of cell growth
0.166363	0.290235	GOBP name	124	8.85669e-06	0.000303861	chromatin remodeling
-0.141884	-0.47002	GOMF name	56	8.94065e-06	0.000969167	amine transmembrane transporter activity
-0.114507	0.294599	GOBP name	131	9.01621e-06	0.000305561	microtubule-based process
-0.111146	0.164443	GOBP name	341	1.01496e-05	0.000339827	negative regulation of transcription, DNA-dependent
0.238979	0.399777	GOBP name	62	1.07241e-05	0.000354789	ER to Golgi vesicle-mediated transport
-0.0828511	0.217803	GOMF name	243	1.07262e-05	0.00105702	nucleoside-triphosphatase regulator activity
-0.112959	0.162058	GOBP name	342	1.08386e-05	0.000354359	negative regulation of RNA metabolic process
-0.119701	0.176374	GOBP name	290	1.09794e-05	0.000354789	cellular localization
-0.117326	0.220586	GOCC name	208	1.09805e-05	0.000378503	incipient cellular bud site
0.611346	0.451944	GOBP name	23	1.14296e-05	0.000365089	translational initiation
-0.177413	0.286879	GOBP name	111	1.14402e-05	0.000361277	microtubule cytoskeleton organization
-0.426617	0.316508	GOBP name	44	1.14746e-05	0.00035829	regulation of filamentous growth
-0.13629	0.0722529	GOBP name	592	1.1859e-05	0.000366181	cell cycle process
0.323325	-0.327516	KEGG name	58	1.29582e-05	0.000846603	Ribosome biogenesis in eukaryotes
-0.0126526	0.328481	GOMF name	119	1.31842e-05	0.00119097	phosphatidylinositol binding
-0.46049	0.627263	GOBP name	20	1.40159e-05	0.000428024	negative regulation of Rho protein signal transduction
-0.154073	0.219591	GOBP name	174	1.40874e-05	0.000425533	regulation of signaling
-0.154073	0.219591	GOBP name	174	1.40874e-05	0.000420957	regulation of signal transduction
-0.0982747	0.168535	GOBP name	341	1.46691e-05	0.000433674	DNA metabolic process
0.122394	0.147085	GOBP name	384	1.47019e-05	0.00043007	macromolecular complex assembly
-0.0364344	0.157699	GOBP name	517	1.69092e-05	0.000489485	positive regulation of biological process
0.30804	0.412524	GOBP name	48	1.86362e-05	0.000533917	ATP-dependent chromatin remodeling
-0.321155	0.315898	GOBP name	58	1.97284e-05	0.00055944	regulation of Rho protein signal transduction
-0.143503	0.330197	GOBP name	92	2.05152e-05	0.000575876	double-strand break repair
-0.20478	0.45095	GOBP name	48	2.10113e-05	0.000583905	cellular protein complex localization
0.519871	0.712838	GOCC name	16	2.13702e-05	0.000695719	RSC complex
-0.187697	0.270648	GOBP name	109	2.14469e-05	0.000590108	regulation of small GTPase mediated signal transduction
0.120568	0.145824	GOBP name	377	2.15181e-05	0.000586262	cellular macromolecular complex assembly
-0.261338	0.272036	GOBP name	82	2.25182e-05	0.000607555	regulation of cell communication
-0.166564	0.350315	GOBP name	78	2.28527e-05	0.000610651	regulation of growth
-0.403232	-0.695822	GOBP name	19	2.36636e-05	0.000626297	glycogen biosynthetic process
0.0694	0.138792	GOBP name	570	2.63823e-05	0.000691664	intracellular transport
-0.415479	0.302754	GOBP name	43	2.71227e-05	0.000697907	regulation of growth of unicellular organism as a thread of attached cells
-0.415479	0.302754	GOBP name	43	2.71227e-05	0.000704429	regulation of pseudohyphal growth
0.648887	0.825255	GOCC name	11	2.74744e-05	0.000847368	6-phosphofructokinase complex
0.648887	0.825255	GOMF name	11	2.74744e-05	0.00229094	6-phosphofructokinase activity
0.648887	0.825255	GOBP name	11	2.74744e-05	0.000700471	fructose 6-phosphate metabolic process
-0.08914	0.16746	GOBP name	338	2.7548e-05	0.000695962	localization
-0.320078	-0.51444	KEGG name	33	2.8117e-05	0.00137773	Starch and sucrose metabolism
-0.110101	0.23254	GOMF name	177	2.8431e-05	0.00220137	small GTPase regulator activity
-0.0300289	0.179055	GOBP name	375	3.05214e-05	0.000764135	cytoskeleton organization
-0.0987175	0.170462	GOCC name	305	3.26847e-05	0.000957661	cellular bud tip
-0.0780775	0.138817	GOBP name	482	3.54266e-05	0.000879022	negative regulation of metabolic process
-0.0740417	0.146824	GOBP name	449	3.57915e-05	0.000880218	negative regulation of macromolecule metabolic process
-0.200193	0.238767	KEGG name	115	3.63756e-05	0.00142593	MAPK signaling pathway - yeast
0.116104	0.311685	GOBP name	107	3.68586e-05	0.00089851	protein-DNA complex subunit organization
-0.482218	0.347993	KEGG name	31	3.687e-05	0.00120442	DNA replication
0.722891	0.803358	GOCC name	10	3.88532e-05	0.00108419	endoplasmic reticulum-Golgi intermediate compartment
-0.141292	0.179435	GOBP name	217	3.9514e-05	0.000954865	regulation of gene expression, epigenetic
-0.158571	0.144696	GOCC name	247	3.95988e-05	0.00105477	nuclear chromosome part
0.299868	0.27963	GOBP name	69	4.62356e-05	0.00110766	cellular macromolecular complex disassembly
0.299868	0.27963	GOBP name	69	4.62356e-05	0.00109819	macromolecular complex disassembly
-0.108727	0.216123	GOBP name	190	4.62931e-05	0.00109024	cytokinetic process
-0.137657	0.294167	GOMF name	103	4.85985e-05	0.00351205	guanyl-nucleotide exchange factor activity
0.238979	0.0881392	GOCC name	178	5.25116e-05	0.0013379	actin cortical patch
-0.0182654	-0.198285	GOMF name	292	5.48159e-05	0.00371378	substrate-specific transporter activity
0.447656	0.176862	GOCC name	48	5.76661e-05	0.00140801	ribosome
0.22467	0.25833	GOBP name	97	5.78642e-05	0.0013513	nucleosome organization
0.237962	0.124032	GOBP name	158	6.08614e-05	0.00140945	ribonucleoprotein complex assembly
-0.15911	0.199556	GOBP name	163	6.21623e-05	0.00142768	small GTPase mediated signal transduction
-0.107052	0.115511	GOCC name	457	6.24676e-05	0.00146424	cellular bud neck
-0.112279	0.137201	GOCC name	352	6.27272e-05	0.00141377	chromosomal part
0.231363	0.128237	GOBP name	162	6.38684e-05	0.00145484	ribonucleoprotein complex subunit organization
-0.0107927	-0.482097	GOMF name	46	6.4934e-05	0.0041405	amino acid transmembrane transporter activity
-0.116043	0.152444	GOBP name	295	6.77759e-05	0.0015313	intracellular signal transduction
-0.175084	-0.409871	GOBP name	55	6.87513e-05	0.00154081	regulation of cytokinesis
0.0669565	-0.405843	GOBP name	62	7.01536e-05	0.00155965	cellular glucan metabolic process
0.0669565	-0.405843	GOBP name	62	7.01536e-05	0.00154728	glucan metabolic process
-0.22715	0.0626345	GOBP name	193	7.02493e-05	0.00153719	regulation of mitotic cell cycle
0.338549	0.309886	GOMF name	52	7.32217e-05	0.00440957	actin binding
-0.585466	0.18754	GOCC name	27	7.6539e-05	0.00166118	RENT complex
-0.226228	0.306185	GOBP name	70	7.73527e-05	0.0016794	regulation of cell growth
-0.0742819	0.192503	GOBP name	249	8.11168e-05	0.00174747	response to DNA damage stimulus
0.289794	-0.422583	GOCC name	38	8.44692e-05	0.00176782	preribosome, large subunit precursor
-0.103714	0.130944	GOBP name	382	9.07865e-05	0.00192592	negative regulation of nitrogen compound metabolic process
-0.103714	0.130944	GOBP name	382	9.07865e-05	0.00194074	negative regulation of nucleobase-containing compound metabolic process
-0.0486751	0.140902	GOBP name	499	9.14496e-05	0.00192529	regulation of transcription from RNA polymerase II promoter
-0.190244	0.223969	GOBP name	116	9.23011e-05	0.00192861	budding cell bud growth
0.20884	0.28435	GOBP name	86	9.27477e-05	0.00192348	cellular component disassembly at cellular level
0.20884	0.28435	GOBP name	86	9.27477e-05	0.00190923	cellular component disassembly
-0.212402	0.307299	GOBP name	71	9.46613e-05	0.00193429	chromatin silencing at silent mating-type cassette
0.470371	0.602701	GOBP name	18	9.52794e-05	0.00191871	hydrogen transport
0.470371	0.602701	GOBP name	18	9.52794e-05	0.00193271	proton transport
0.173223	0.182166	GOCC name	172	9.67839e-05	0.0019557	Golgi apparatus part
-0.0829124	-0.37979	GOMF name	68	0.000105605	0.00602507	organic acid transmembrane transporter activity
0.0944529	0.0615483	GOMF name	1036	0.000109896	0.00595635	nucleic acid binding
-0.232616	-0.144722	KEGG name	141	0.000109946	0.0030785	Meiosis - yeast
-0.188138	-0.386433	GOBP name	56	0.000109979	0.00219878	regulation of cell division
0.103494	0.161804	GOCC name	4419	0.000113076	0.00220876	intracellular part
0.0055919	0.353901	KEGG name	79	0.000128934	0.00315889	RNA degradation
0.68414	0.499377	GOBP name	14	0.000135987	0.00268019	translation reinitiation
0.68414	0.499377	GOBP name	14	0.000135987	0.00269933	cytoplasmic translational initiation
0.35813	0.361464	GOBP name	39	0.000137975	0.00270023	stress granule assembly
-0.228686	0.32101	GOBP name	60	0.000150004	0.00291512	response to pheromone
-0.185368	0.269434	GOCC name	87	0.00015932	0.00301167	transcription factor complex
-0.276519	0.235965	GOBP name	70	0.000159724	0.00308244	negative regulation of response to stimulus
-0.059863	-0.378198	GOMF name	66	0.000162761	0.00840157	carboxylic acid transmembrane transporter activity
0.34436	0.554005	GOBP name	23	0.000165586	0.0031518	nucleosome disassembly
0.34436	0.554005	GOBP name	23	0.000165586	0.00317354	protein-DNA complex disassembly
0.0301077	0.139758	GOBP name	522	0.000174963	0.00330764	vesicle-mediated transport
-0.0533734	-0.260499	GOMF name	138	0.000176203	0.00830454	transcription regulatory region DNA binding
-0.0533734	-0.260499	GOMF name	138	0.000176203	0.00868202	regulatory region DNA binding
-0.0216601	0.271014	GOCC name	129	0.000176342	0.00322927	cytoskeleton
-0.176976	0.00572672	GOBP name	317	0.000181641	0.00341068	regulation of cell cycle
-0.159405	0.352977	GOCC name	61	0.000182414	0.00314396	cellular bud neck septin structure
-0.159405	0.352977	GOCC name	61	0.000182414	0.00323923	cleavage apparatus septin structure
-0.156947	-0.498486	GOBP name	35	0.000183245	0.0034177	cellular polysaccharide biosynthetic process
0.152583	-0.399237	GOCC name	50	0.000185881	0.00311218	small-subunit processome
-0.0626323	0.140627	GOBP name	414	0.000195602	0.00362386	negative regulation of cellular macromolecule biosynthetic process
-0.0626323	0.140627	GOBP name	414	0.000195602	0.00359986	negative regulation of macromolecule biosynthetic process
-0.351638	0.279354	GOMF name	44	0.000209641	0.00946879	Rho GTPase activator activity
0.165396	-0.288251	GOBP name	81	0.000215812	0.00394566	cellular component biogenesis at cellular level
0.109718	0.251402	GOMF name	127	0.000222766	0.00965913	chromatin binding
-0.540842	0.155369	GOBP name	28	0.000231868	0.00421151	nucleolus organization
0.15607	-0.28924	GOBP name	82	0.000234099	0.00422443	cellular component biogenesis
0.243228	0.423011	GOCC name	39	0.000247878	0.00392585	vesicle coat
0.243228	0.423011	GOCC name	39	0.000247878	0.00403491	membrane coat
-0.0744511	0.122247	GOBP name	465	0.000254374	0.00456068	negative regulation of cellular metabolic process
-0.0557532	-0.260048	GOMF name	131	0.000255793	0.0106646	transcription regulatory region sequence-specific DNA binding
0.0475792	-0.350499	GOBP name	71	0.000262342	0.00467339	cellular polysaccharide metabolic process
0.39099	0.552716	GOMF name	20	0.000269825	0.010833	ARF GTPase activator activity
0.39099	0.552716	GOBP name	20	0.000269825	0.00477608	regulation of ARF GTPase activity
-0.915764	0.758689	GOBP name	6	0.000272674	0.00479595	positive regulation of transcription involved in G2/M-phase of mitotic cell cycle
-0.0400421	-0.0995596	GOCC name	988	0.000279838	0.0043154	membrane part
-0.0571873	0.136287	GOBP name	429	0.000281862	0.00489558	negative regulation of cellular biosynthetic process
-0.0571873	0.136287	GOBP name	429	0.000281862	0.00492637	negative regulation of biosynthetic process
-0.0637432	0.280898	GOMF name	106	0.000284484	0.0110136	GTPase activator activity
-0.165854	0.00751102	GOMF name	338	0.000298358	0.0111524	protein kinase activity
-0.0601325	-0.245901	GOMF name	142	0.000299961	0.0108386	regulatory region nucleic acid binding
-0.260377	0.237402	GOBP name	68	0.000309133	0.00533591	negative regulation of cell communication
-0.247976	0.307151	GOBP name	54	0.00031114	0.00530465	negative regulation of signaling
-0.247976	0.307151	GOBP name	54	0.00031114	0.00533739	negative regulation of signal transduction
-0.323693	0.285834	GOBP name	45	0.000311853	0.00528439	microtubule nucleation
0.327116	0.488115	GOBP name	26	0.000314067	0.00528965	regulation of transcription initiation, DNA-dependent
0.327116	0.488115	GOBP name	26	0.000314067	0.00525778	regulation of transcription initiation from RNA polymerase II promoter
-0.154219	0.16226	GOBP name	171	0.00032552	0.00541689	gene silencing
0.314441	0.330718	KEGG name	43	0.000334283	0.00727995	Endocytosis
-0.391661	0.311302	GOBP name	33	0.000343297	0.00567871	DNA-dependent DNA replication initiation
-0.00451149	0.112811	GOBP name	3915	0.000346646	0.00570018	cellular process
-0.0745611	0.385158	GOBP name	55	0.000349034	0.00570567	organelle inheritance
-0.0168671	0.149334	GOBP name	407	0.000353193	0.00573991	positive regulation of cellular metabolic process
0.690755	0.633326	GOCC name	10	0.000363692	0.00546471	COPI vesicle coat
-0.151624	0.373037	GOBP name	51	0.00037487	0.00605677	protein complex localization
-0.163985	0.00758993	GOMF name	334	0.000375926	0.0131453	protein serine/threonine kinase activity
-0.00528405	-0.437672	GOBP name	44	0.00039117	0.00628359	nitrogen compound transport
-0.279515	0.182355	GOBP name	73	0.000411028	0.00656464	nucleus organization
-0.33695	0.415922	GOCC name	28	0.00041501	0.0060799	microtubule organizing center part
-0.0446674	0.0835993	GOBP name	1185	0.000431877	0.0068582	response to stimulus
-0.0379881	0.318554	GOBP name	80	0.000451651	0.00713147	regulation of gene silencing
-0.0379881	0.318554	GOBP name	80	0.000451651	0.00709118	regulation of chromatin silencing
-0.490157	0.501809	GOCC name	16	0.000460049	0.00657534	central plaque of spindle pole body
0.0338791	0.469662	GOBP name	37	0.000478214	0.00746605	positive regulation of organelle organization
-0.268332	0.202319	GOCC name	70	0.000487618	0.00680343	cell cortex
0.693535	0.672947	GOBP name	9	0.000487677	0.00757125	chromatin remodeling at centromere
-0.322224	0.149558	GOCC name	63	0.000487856	0.00649735	microtubule organizing center
-0.322224	0.149558	GOCC name	63	0.000487856	0.00664845	spindle pole body
-0.213958	-0.124621	GOBP name	140	0.00049449	0.00763437	cell cycle checkpoint
-0.213958	-0.124621	GOBP name	140	0.00049449	0.00759219	regulation of cell cycle arrest
0.00311275	0.547545	GOBP name	27	0.000498111	0.00756422	double-strand break repair via nonhomologous end joining
0.00311275	0.547545	GOBP name	27	0.000498111	0.00760578	non-recombinational repair
-0.0423403	0.430651	GOMF name	43	0.00050133	0.0169826	phosphatidylinositol-3-phosphate binding
-0.0689271	-0.139003	GOMF name	373	0.000508519	0.0167041	transporter activity
-0.145997	-0.44928	GOBP name	37	0.000512475	0.00774004	ion transmembrane transport
-0.0507294	0.126509	GOBP name	466	0.000514326	0.00772601	signal transduction
0.615911	0.175399	GOCC name	20	0.00051479	0.00670371	eukaryotic translation initiation factor 4F complex
0.0506228	0.119741	GOMF name	548	0.000532512	0.0169777	protein binding
-0.153664	0.154638	GOBP name	167	0.00054014	0.00802699	negative regulation of gene expression, epigenetic
-0.153664	0.154638	GOBP name	167	0.00054014	0.00807015	chromatin silencing
-0.0147506	0.144127	GOBP name	409	0.000560217	0.00828108	positive regulation of metabolic process
0.618504	0.255624	KEGG name	18	0.000599637	0.0117529	Viral myocarditis
-0.0362195	0.145879	GOBP name	367	0.00061704	0.00907277	positive regulation of nitrogen compound metabolic process
-0.0362195	0.145879	GOBP name	367	0.00061704	0.00902502	positive regulation of nucleobase-containing compound metabolic process
-0.0247546	-0.518846	GOMF name	29	0.000633818	0.0196302	L-amino acid transmembrane transporter activity
-0.384449	0.29523	GOBP name	32	0.000637775	0.00927946	telomere tethering at nuclear periphery
-0.0621728	0.177728	GOBP name	222	0.000671809	0.00972374	DNA repair
-0.0139111	-0.317625	GOBP name	77	0.000697538	0.0100438	energy derivation by oxidation of organic compounds
-0.314039	0.395014	GOBP name	29	0.000709222	0.0100558	cellular response to pheromone
-0.314039	0.395014	GOBP name	29	0.000709222	0.0101594	regulation of transcription from RNA polymerase II promoter by pheromones
-0.314039	0.395014	GOBP name	29	0.000709222	0.0101073	regulation of transcription by pheromones
0.0369851	0.124116	GOBP name	513	0.000769888	0.0108605	establishment of protein localization
0.124997	0.12341	GOBP name	267	0.000790142	0.0110899	regulation of protein metabolic process
-0.0998278	-0.461666	GOBP name	34	0.000832769	0.0116295	organic acid transport
-0.0998278	-0.461666	GOBP name	34	0.000832769	0.0115713	carboxylic acid transport
-0.0198308	0.140104	GOBP name	400	0.000837172	0.0115746	positive regulation of macromolecule metabolic process
-0.307247	0.481685	GOCC name	22	0.000846427	0.0107827	septin collar
-0.307247	0.481685	GOCC name	22	0.000846427	0.0105533	cellular bud neck septin collar
0.0247601	-0.363413	GOBP name	56	0.00085571	0.0117724	energy reserve metabolic process
0.0247601	-0.363413	GOBP name	56	0.00085571	0.0117144	glycogen metabolic process
-0.244988	0.36583	GOBP name	37	0.000865843	0.011795	telomere localization
-0.43653	0.635233	GOBP name	12	0.000868091	0.0117679	progressive alteration of chromatin involved in cell aging
-0.86218	0.523607	GOBP name	7	0.000876009	0.0118176	negative regulation of transcription involved in G1 phase of mitotic cell cycle
0.105139	0.259909	GOBP name	98	0.000880303	0.0117614	histone modification
0.105139	0.259909	GOBP name	98	0.000880303	0.0118182	covalent chromatin modification
-0.0471258	0.13989	GOBP name	356	0.000886859	0.0117923	positive regulation of RNA metabolic process
-0.334588	0.659556	GOCC name	13	0.000907592	0.0110802	exocyst
-0.156271	0.302247	GOBP name	62	0.000911393	0.0120608	intracellular mRNA localization
-0.25105	0.373077	GOBP name	35	0.000934842	0.0122544	negative regulation of Ras protein signal transduction
-0.25105	0.373077	GOBP name	35	0.000934842	0.0123124	negative regulation of small GTPase mediated signal transduction
0.348468	0.316599	GOBP name	34	0.000990435	0.0129222	negative regulation of translation
-0.024403	0.140522	GOBP name	378	0.00102107	0.013198	positive regulation of cellular biosynthetic process
-0.024403	0.140522	GOBP name	378	0.00102107	0.0132596	positive regulation of biosynthetic process
0.325093	0.127195	GOCC name	61	0.00103278	0.0123512	cytosolic part
0.044186	0.0658098	GOCC name	2301	0.001038	0.0121653	organelle part
0.044186	0.0658098	GOCC name	2301	0.001038	0.0119268	intracellular organelle part
0.0203195	-0.596486	GOCC name	20	0.00106437	0.0119947	integral to plasma membrane
0.114618	0.130936	GOBP name	258	0.00106795	0.0137399	regulation of cellular protein metabolic process
0.146973	0.371823	GOBP name	46	0.0010811	0.0137815	regulation of GTP catabolic process
0.146973	0.371823	GOBP name	46	0.0010811	0.013845	regulation of GTPase activity
0.666871	0.0354597	GOBP name	16	0.00109023	0.0138345	translational termination
0.296113	0.408892	GOBP name	29	0.00109114	0.013783	regulation of translational initiation
0.102899	0.384199	GOBP name	46	0.00110192	0.0138563	Golgi to plasma membrane transport
0.118905	0.0126059	GOCC name	562	0.00114658	0.0126773	non-membrane-bounded organelle
0.118905	0.0126059	GOCC name	562	0.00114658	0.0124425	intracellular non-membrane-bounded organelle
-0.0377166	0.135586	GOBP name	378	0.00114665	0.0143537	protein modification process
-0.236855	-0.20426	GOBP name	74	0.00130973	0.0163216	mitotic cell cycle checkpoint
-0.523183	-0.952927	GOBP name	6	0.00131288	0.0162156	plasma membrane selenite transport
-0.523183	-0.952927	GOBP name	6	0.00131288	0.0161438	pyruvate transport
-0.523183	-0.952927	GOBP name	6	0.00131288	0.0160727	plasma membrane pyruvate transport
-0.523183	-0.952927	GOBP name	6	0.00131288	0.016288	plasma membrane lactate transport
-0.523183	-0.952927	GOBP name	6	0.00131288	0.0160022	lactate transmembrane transport
-0.523183	-0.952927	GOBP name	6	0.00131288	0.0159323	lactate transport
-0.101161	0.589505	GOBP name	19	0.00131323	0.0158673	regulation of ARF protein signal transduction
-0.205068	0.293439	GOBP name	52	0.00134617	0.0161948	cellular response to heat
-0.34009	0.13684	GOBP name	50	0.00134914	0.0161606	protein dephosphorylation
0.302689	0.259605	GOBP name	45	0.00134916	0.0160915	organelle assembly
-0.00919351	0.135857	GOBP name	400	0.00134937	0.0160252	regulation of cellular component organization
-0.0551931	0.338297	GOBP name	58	0.00136102	0.0160266	cellular membrane fusion
-0.0551931	0.338297	GOBP name	58	0.00136102	0.0160948	membrane fusion
0.252874	0.590664	GOCC name	17	0.00137257	0.0146241	transcriptionally active chromatin
-0.258548	0.666754	GOBP name	13	0.00137502	0.0161231	regulation of transcription involved in G2/M-phase of mitotic cell cycle
-0.0835993	-0.0837003	GOCC name	574	0.00138763	0.0145205	plasma membrane
-0.592932	-0.187354	GOCC name	18	0.00139363	0.0143275	SBF transcription complex
-0.0411477	-0.824952	GOBP name	10	0.00139411	0.0162783	positive regulation of transcription on exit from mitosis
-0.0411477	-0.824952	GOBP name	10	0.00139411	0.0162102	positive regulation of transcription on exit from mitosis, from RNA polymerase II promoter
-0.14674	0.301874	GOBP name	59	0.00142081	0.0163836	negative regulation of chromatin silencing
-0.14674	0.301874	GOBP name	59	0.00142081	0.0164518	negative regulation of gene silencing
-0.14674	0.301874	GOBP name	59	0.00142081	0.0163159	positive regulation of gene expression, epigenetic
0.520397	0.378133	GOCC name	17	0.0014234	0.0143813	eukaryotic translation initiation factor 3 complex
-0.0730399	0.181724	GOBP name	178	0.00144074	0.0164767	negative regulation of transcription from RNA polymerase II promoter
0.35473	0.555384	GOBP name	16	0.0015071	0.0171649	establishment of protein localization in mitochondrion
0.35473	0.555384	GOBP name	16	0.0015071	0.0170948	protein targeting to mitochondrion
0.35473	0.555384	GOBP name	16	0.0015071	0.0170253	mitochondrial transport
0.0727562	0.284676	GOBP name	80	0.00153321	0.0172501	positive regulation of cellular component organization
-0.29636	0.302498	GOBP name	36	0.00155487	0.0174234	DNA strand elongation involved in DNA replication
-0.29636	0.302498	GOBP name	36	0.00155487	0.0173534	DNA strand elongation
0.246266	0.501269	GOBP name	22	0.00158524	0.0176215	regulation of histone methylation
0.100743	0.519914	GOBP name	24	0.00161605	0.0178924	positive regulation of cytoskeleton organization
-0.478444	-0.729046	GOBP name	9	0.00162747	0.0179474	monocarboxylic acid transport
-0.478444	-0.729046	GOBP name	9	0.00162747	0.0178765	organic anion transport
-0.303317	0.665958	GOBP name	12	0.00162863	0.0177489	exocyst localization
-0.303317	0.665958	GOBP name	12	0.00162863	0.0178187	exocyst assembly
-0.14109	0.286861	GOBP name	63	0.00169681	0.0184197	RNA localization
-0.353976	0.368969	GOBP name	24	0.00178855	0.019265	negative regulation of transcription by pheromones
-0.353976	0.368969	GOBP name	24	0.00178855	0.01934	negative regulation of transcription from RNA polymerase II promoter by pheromones
-0.0795712	0.153226	GOBP name	221	0.00179597	0.0192702	positive regulation of transcription from RNA polymerase II promoter
0.618973	0.60136	GOBP name	9	0.00185075	0.0197059	regulation of Arp2/3 complex-mediated actin nucleation
0.618973	0.60136	GOBP name	9	0.00185075	0.0196307	regulation of actin nucleation
0.618973	0.60136	GOBP name	9	0.00185075	0.019556	negative regulation of actin nucleation
0.618973	0.60136	GOBP name	9	0.00185075	0.0197817	negative regulation of Arp2/3 complex-mediated actin nucleation
